# Supplementary material
Source: publisher figshare collection journal article supplement (https://acs.figshare.com/ndownloader/files/3783934)
Supplement: Supplementary file 1 [file 3783934]

Electronic Supplementary Information (Online Only)

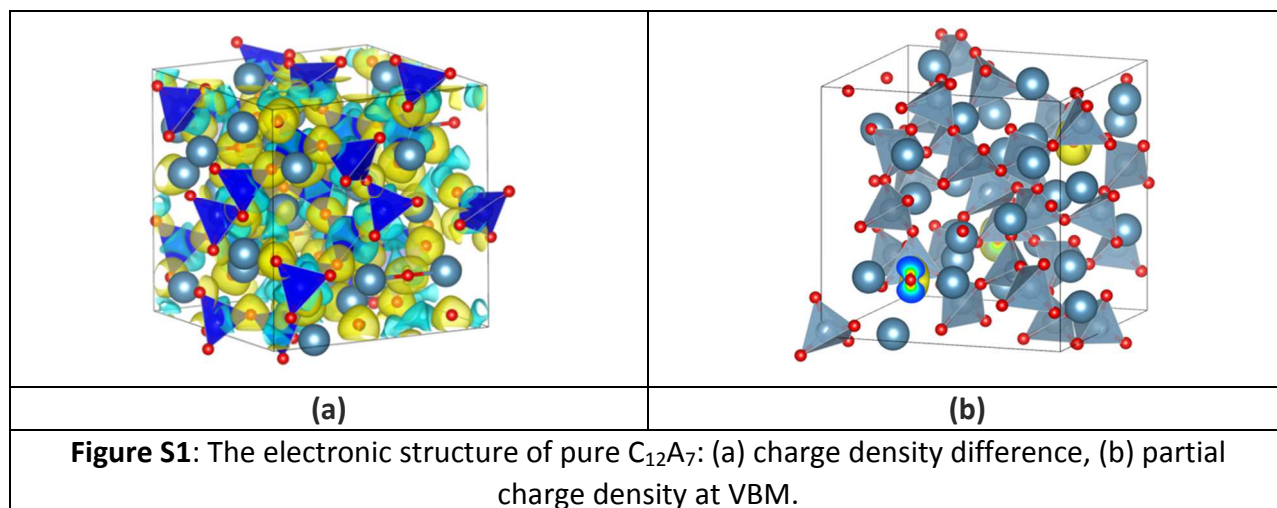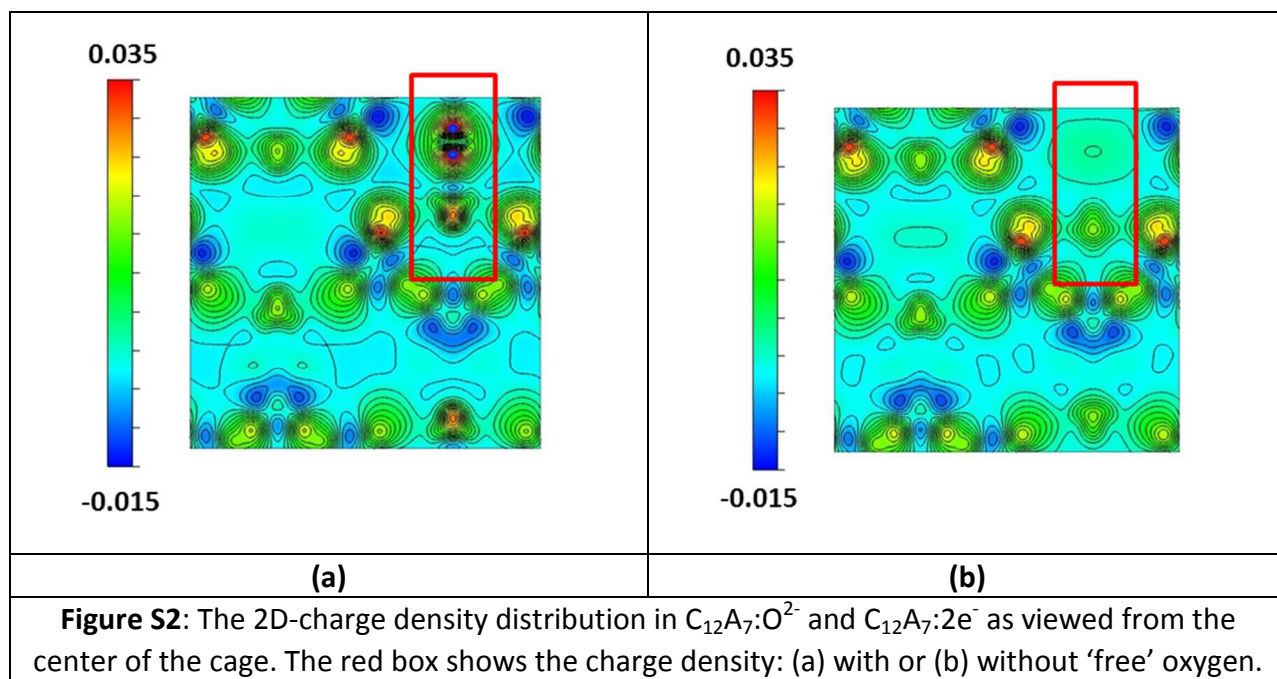

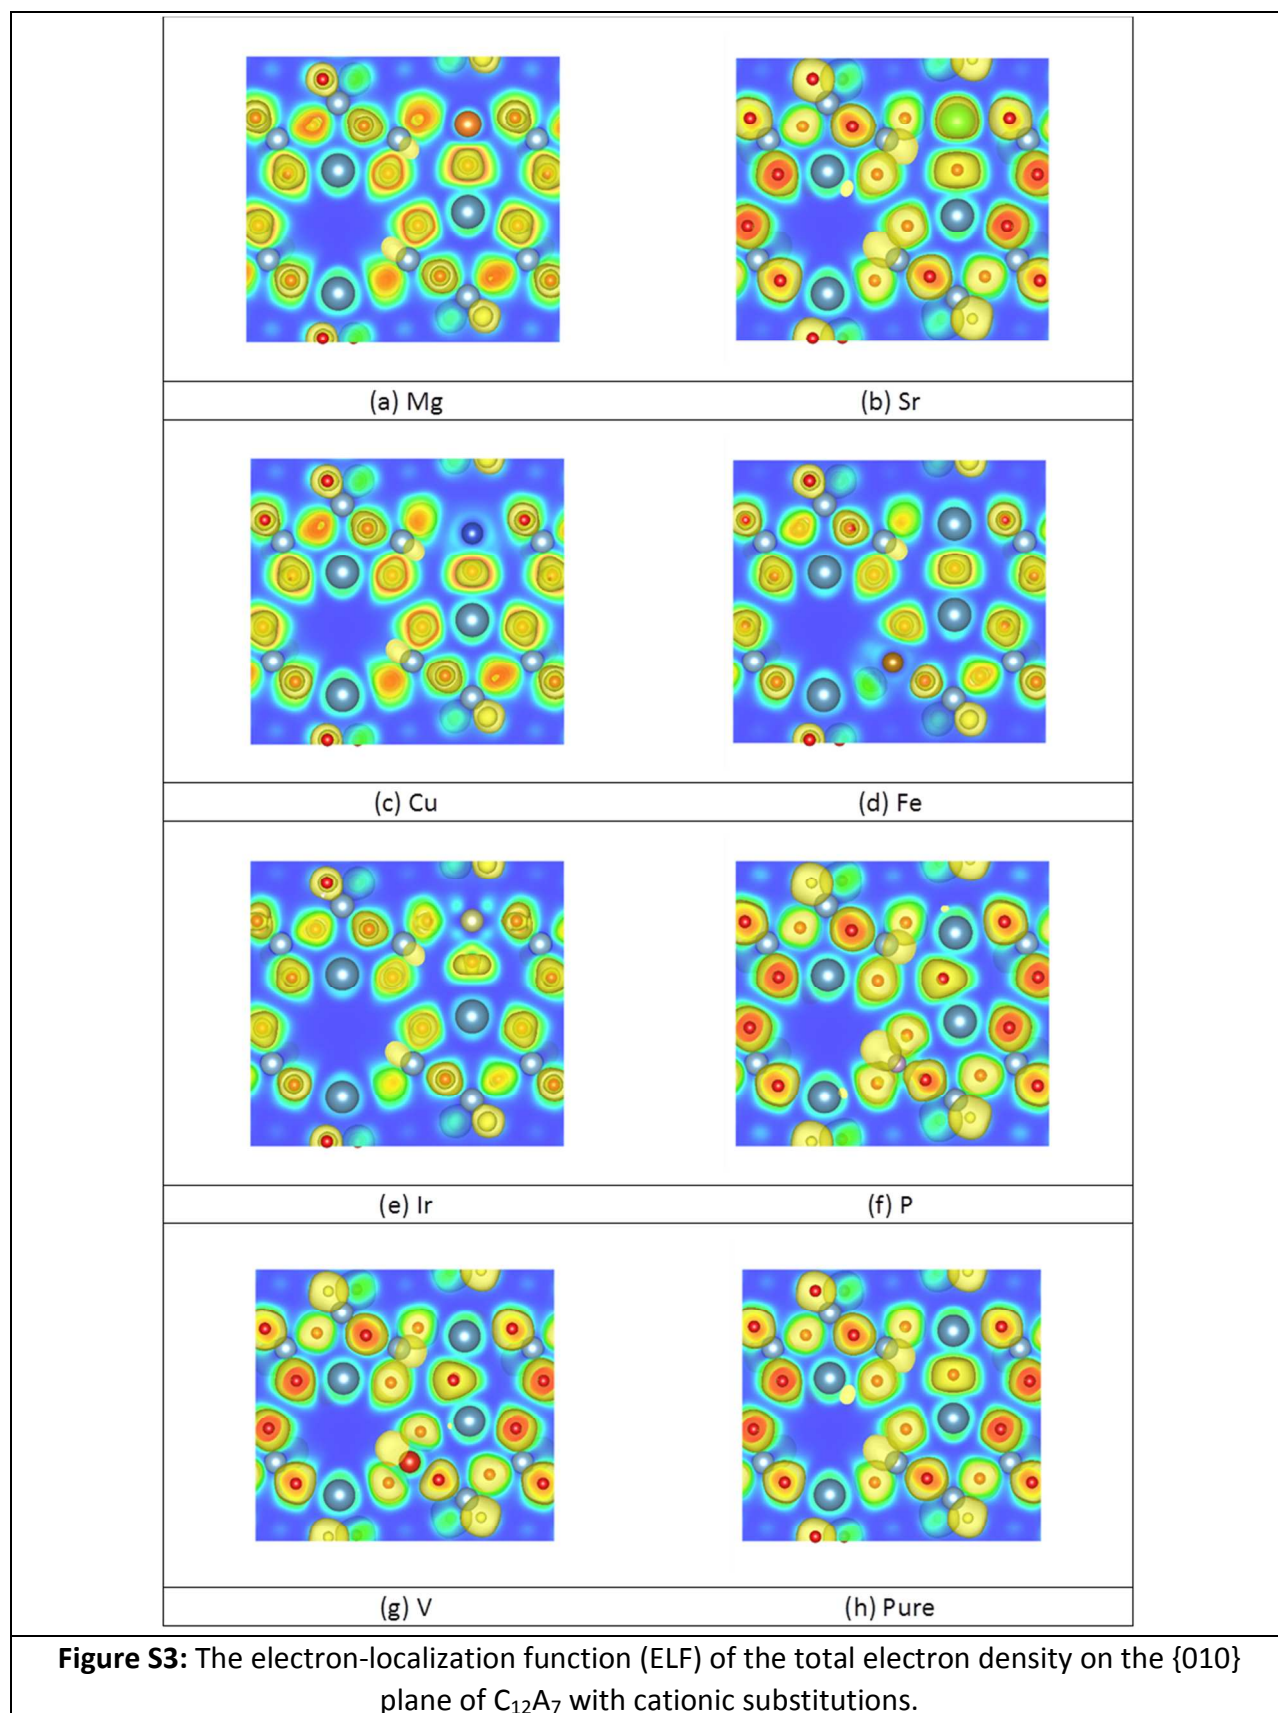

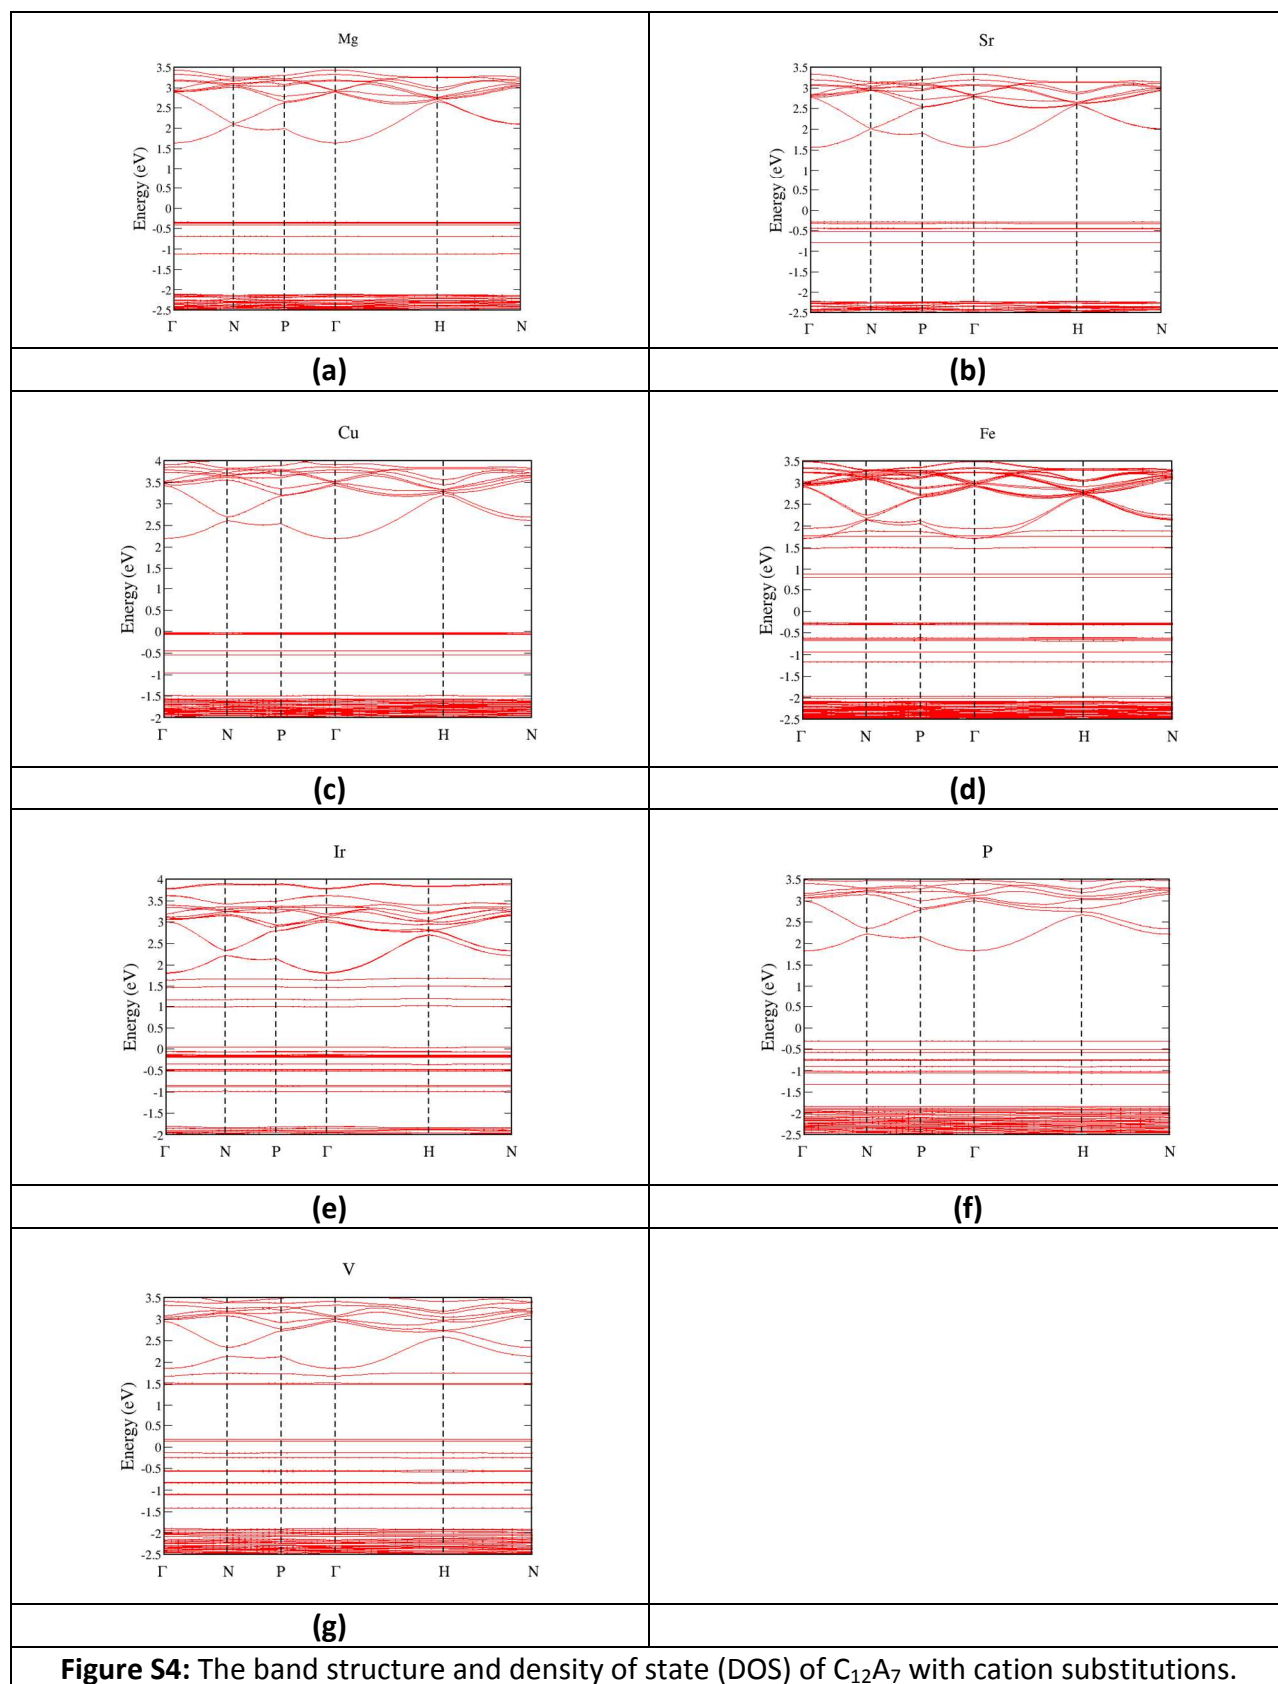

**Figure S4:** The band structure and density of state (DOS) of  $C_{12}A_7$  with cation substitutions.

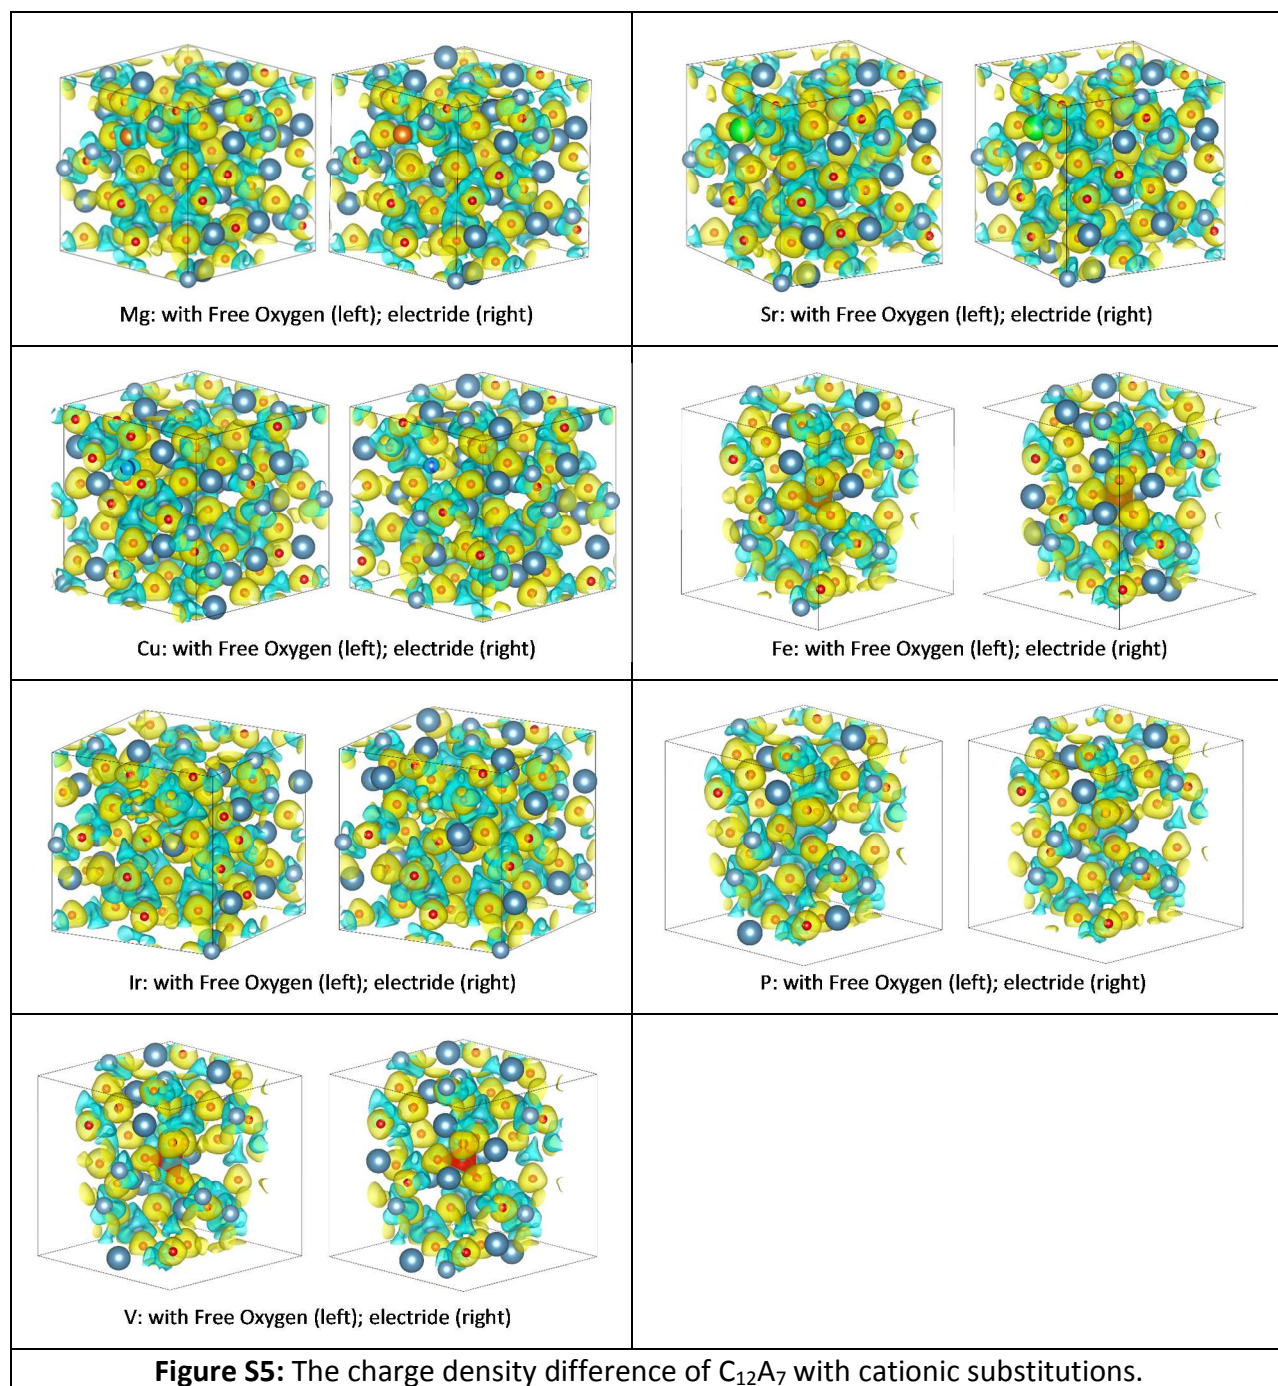

| <b>Table S1: The Bader charges and ELF values for Cu and Ir doped C<sub>12</sub>A<sub>7</sub> variants</b> |           |           |            |                     |                 |                 |
|------------------------------------------------------------------------------------------------------------|-----------|-----------|------------|---------------------|-----------------|-----------------|
|                                                                                                            | <b>Ca</b> | <b>Al</b> | <b>O</b>   | <b>Free O</b>       | <b>Impurity</b> | <b>ELF max.</b> |
| <b>Pure</b>                                                                                                | 1.57      | 2.44      | -1.56      | -1.36, -1.46        | -               | 0.8612          |
| <b>electride</b>                                                                                           | 1.56      | 2.43      | -1.58      | -                   | -               | 0.9110          |
| <b>Mg</b>                                                                                                  | 1.51-1.57 | 2.43      | -1.57-1.62 | -1.37, -1.47        | 1.71            | 0.7980          |
| <b>electride</b>                                                                                           | 1.47-1.56 | 2.43      | -1.59-1.64 | -                   | 1.11            | 0.9815          |
| <b>Cu</b>                                                                                                  | 1.52-1.57 | 2.44      | -1.56-1.62 | -1.06, -1.28        | 0.83            | 0.8625          |
| <b>electride</b>                                                                                           | 1.56      | 2.44      | -1.57-1.63 | -                   | -0.56           | 0.8638          |
| <b>Sr</b>                                                                                                  | 1.50-1.57 | 2.44      | -1.57-1.63 | -1.36, -1.38        | 1.55            | 0.8622          |
| <b>electride</b>                                                                                           | 1.43-1.56 | 2.44      | -1.59-1.63 | -                   | 1.39            | 0.9415          |
| <b>Fe</b>                                                                                                  | 1.51-1.57 | 2.44      | -1.38-1.62 | -1.37,-1.36         | 1.51            | 0.7121          |
| <b>electride</b>                                                                                           | 1.53-1.55 | 2.43      | -1.57-1.64 | -                   | 0.87            | 0.7140          |
| <b>Ir</b>                                                                                                  | 1.53-1.56 | 2.43      | -1.56-1.62 | -1.34, -0.88, -1.32 | 1.42            | 0.7585          |
| <b>electride</b>                                                                                           | 1.54-1.56 | 2.43      | -1.50-1.63 | -                   | -0.34           | 0.7166          |
| <b>V</b>                                                                                                   | 1.53-1.57 | 2.44      | -1.21-1.63 | -1.41, -1.39, -1.38 | 2.09            | 0.8661          |
| <b>electride</b>                                                                                           | 1.50-1.56 | 2.43      | -1.53-1.65 | -                   | 1.17            | 0.8776          |
| <b>P</b>                                                                                                   | 1.53-1.57 | 2.44      | -1.56-1.62 | -1.41, -1.39, 1.41  | 3.67            | 0.8733          |
| <b>electride</b>                                                                                           | 1.51-1.56 | 2.43      | -1.64-1.66 | -                   | 3.64            | 0.8695          |

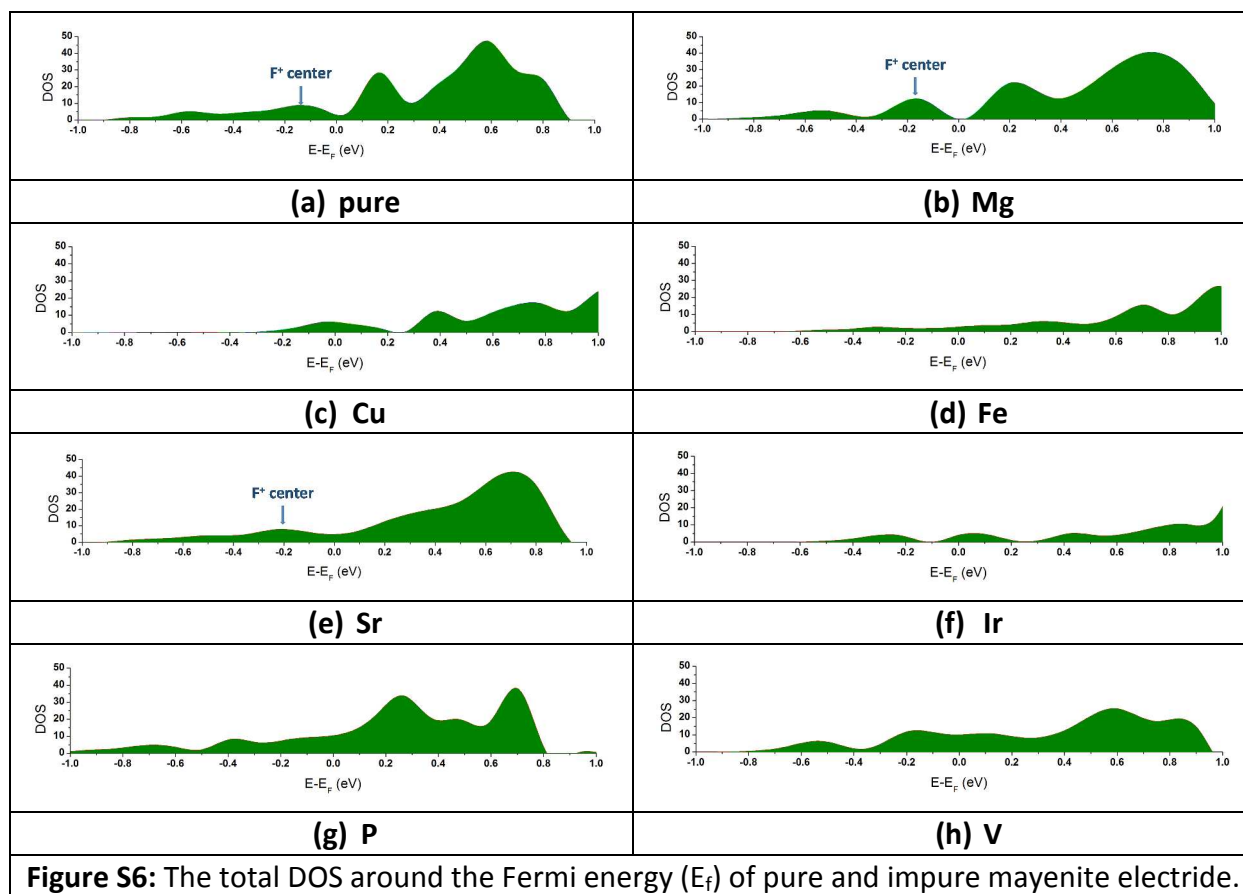

**Figure S6:** The total DOS around the Fermi energy ( $E_f$ ) of pure and impure mayenite electride.

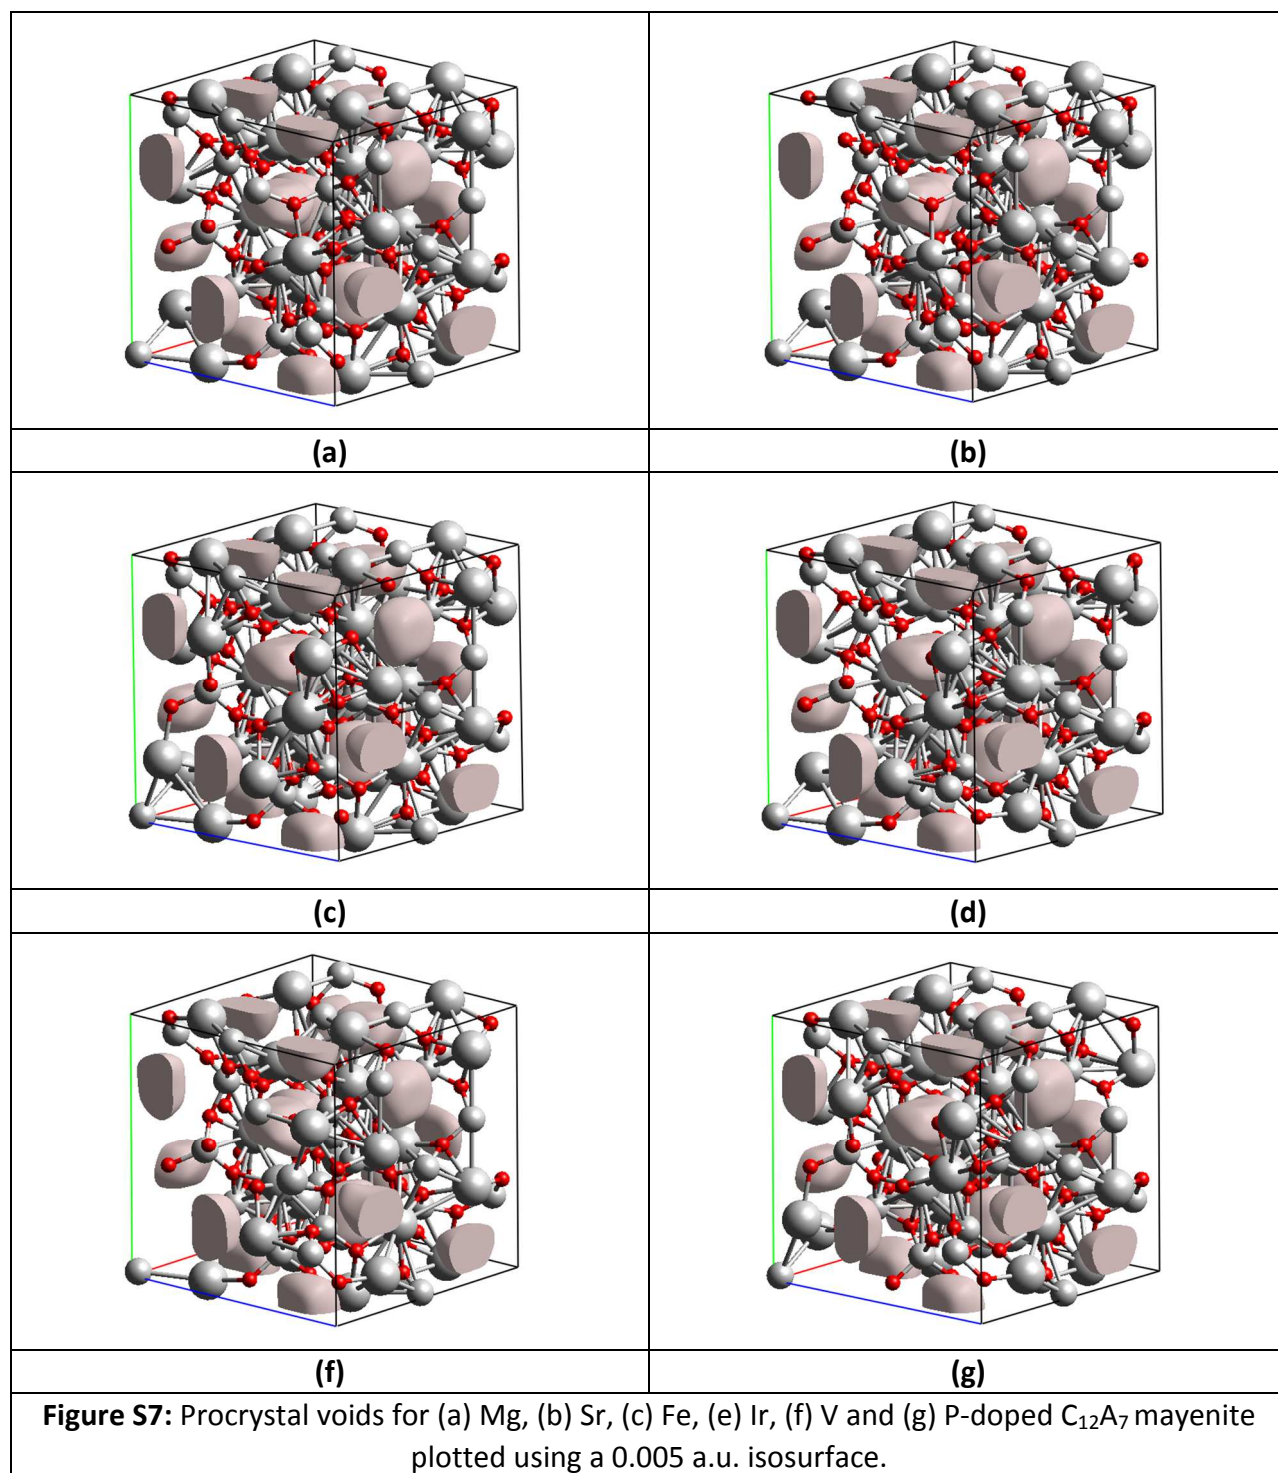

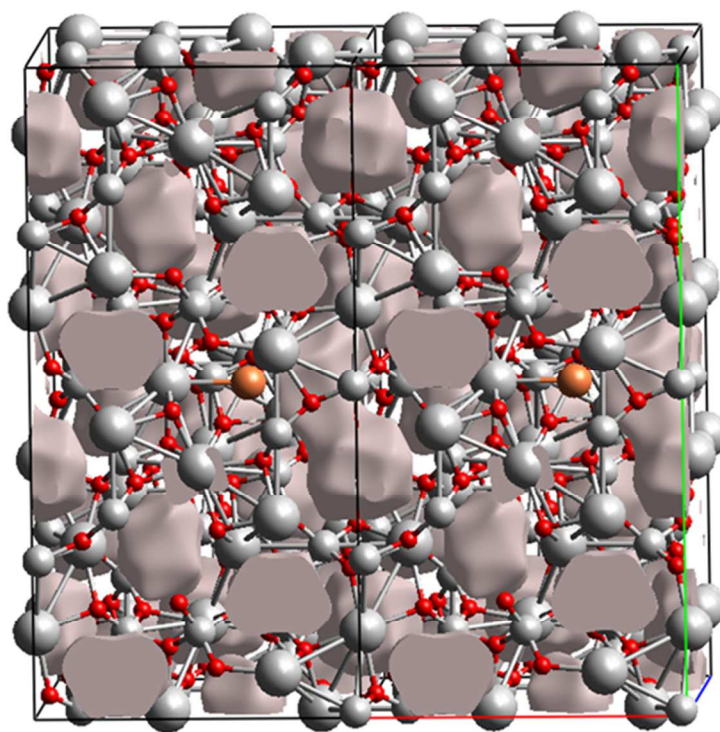

**Figure S8:** Procrystal voids for Cu-doped C<sub>12</sub>A<sub>7</sub> mayenite (1 X 2 X 1 supercell) plot using a 0.01 a.u. isosurface. Repeating one unit cell along the x-axis clarifies the persistence of the channel.
